# Supplementary material
Source: Springer Nature journal article supplement (https://www.springermedizin.de/resource/supplementary/12936_2013_3152_MOESM3_ESM.pdf/9546286)
Supplement: MOESM3 [file 9546286]

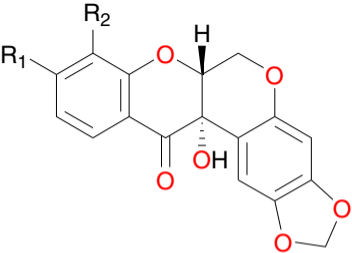

Usarotenoid C (**35**):

R<sub>1</sub> = OMe, R<sub>2</sub> = Prenyl

Usarotenoid A (**36**):

R<sub>1</sub> - R<sub>2</sub> = -OCH<sub>2</sub>O-

(+)-Usarotenoid B (**37**):

R<sub>1</sub> = R<sub>2</sub> = OMe

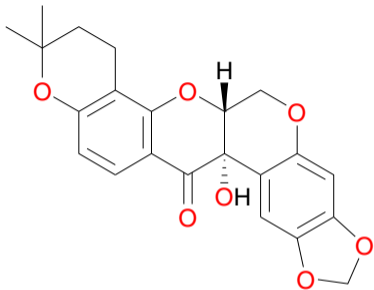

(+)-12a-*epi*-millettosin (**38**)
